# Supplementary material for: Comparison of Kit-Based Metabolomics with Other Methodologies in a Large Cohort, towards Establishing Reference Values
Source: MDPI journal article supplement (doi:10.3390/metabo11100652), 2021-09-24
Supplement: s1 [file s1]

## Supplemental Materials

### Addressing the accuracy of reference values in a large-scale cohort by kit-based metabolomics compared to other methodologies

Daisuke Saigusa <sup>1,2\*</sup>, Eiji Hishinuma <sup>1,3</sup>, Naomi Matsukawa <sup>1,2</sup>, Masatomo Takahashi <sup>4</sup>, Jun Inoue <sup>1,3</sup>, Shu Tadaka <sup>1,5</sup>, Ikuko N Motoike <sup>1,5</sup>, Atsushi Hozawa <sup>6</sup>, Yoshihiro Izumi <sup>4,7</sup>, Takeshi Bamba <sup>4,7</sup>, Kengo Kinoshita <sup>1,3,5</sup>, Kim Ekroos <sup>8</sup>, Seizo Koshiba <sup>1,3</sup>, and Masayuki Yamamoto <sup>1,2,3</sup>

<sup>1</sup>Department of Integrative Genomics, Tohoku University Tohoku Medical Megabank Organization, 2-1, Seiryomachi, Aoba-ku, Sendai, 980-8573, Japan

<sup>2</sup>Medical Biochemistry, Tohoku University Graduate School of Medicine, 2-1, Seiryomachi, Aoba-ku, Sendai, 980-8575, Japan

<sup>3</sup>Advanced Research Center for Innovations in Next-Generation Medicine, Tohoku University, 2-1 Seiryomachi, Aoba-ku, Sendai, 980-8573, Japan

<sup>4</sup>Division of Metabolomics, Medical Institute of Bioregulation, Kyushu University, 3-1-1 Maidashi, Higashi-ku, Fukuoka 812-8582, Japan

<sup>5</sup>Graduate School of Information Sciences, Tohoku University, 6-3-09, Aramaki Aza-Aoba, Aoba-ku, Sendai, 980-8579 Japan

<sup>6</sup>Department of Preventive Medicine and Epidemiology, Tohoku University Tohoku Medical Megabank Organization, 2-1, Seiryomachi, Aoba-ku, Sendai, 980-8573, Japan

<sup>7</sup>Department of Systems Life Sciences, Graduate School of Systems Life Sciences, Kyushu University, 3-1-1 Maidashi, Higashi-ku, Fukuoka 812-8582, Japan

<sup>8</sup>Lipidomics Consulting Ltd., 02230 Espoo, Finland

\*Correspondence: saigusa@tohoku.ac.jp; Tel.: +81-22-274-5925

#### Table of contents

P2: Figure S1, Figure S2

P3: Figure S3

P4-6: Figure S4

P7: Figure S5

P8: Figure S6

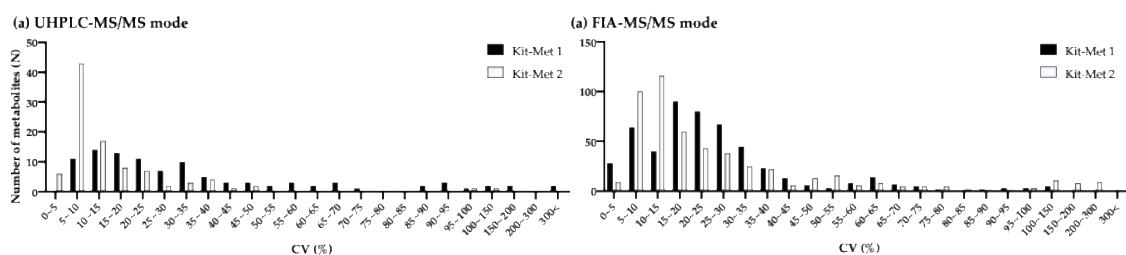

**Figure S1.** Frequency of detected metabolites along with the range of coefficient variation (CV, %) in gQC plasma at UHPLC-MS/MS mode (a, left panel), and FIA-MS/MS mode (b, right panel) by Kit-Met 1 (black bar) and Kit-Met 2 (white bar).

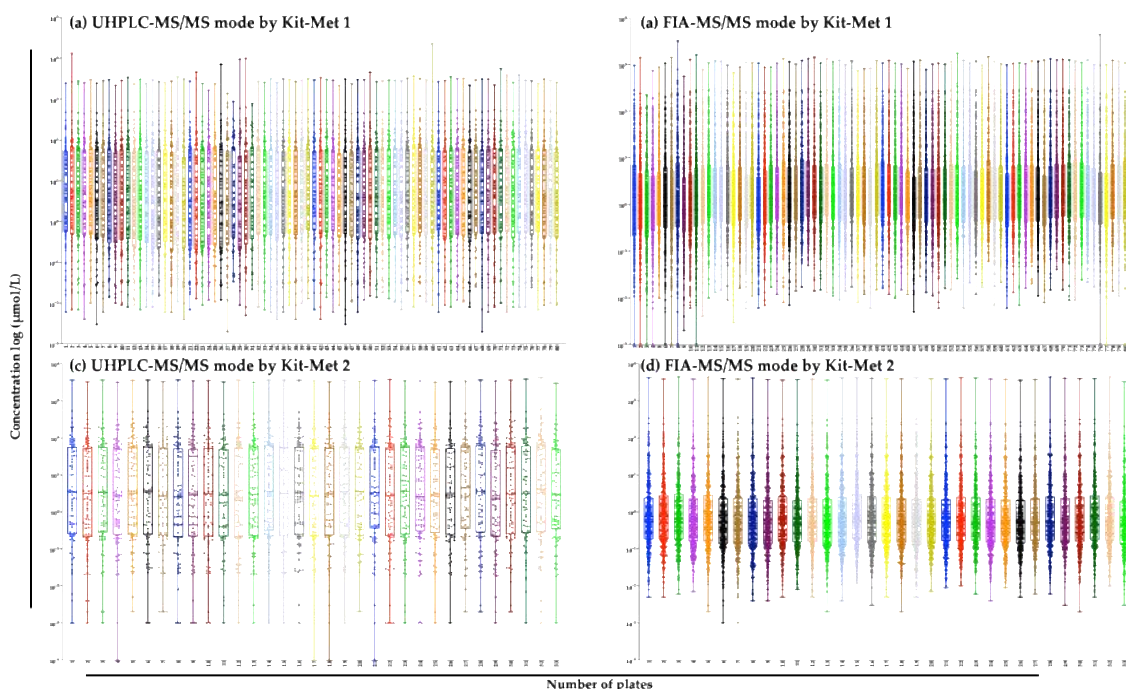

**Figure S2.** The median intensities of boxplot for detected metabolites in NIST plasma. The boxplots of 80 plates by Kit-Met 1 by UHPLC-MS/MS mode (a, upper left panel) and FIA-MS/MS mode (b, right panel), and the 33 plates by Kit-Met 2 by UHPLC-MS/MS mode (c, bottom left panel) and FIA-MS/MS mode (d, bottom right panel) were created and colored for each plate by GraphPad Prism 8.4.3.. Kit-Met 1 and Kit-Met 2 were performed by the Xevo® TQ-S and Xevo® TQ-XS MS system (Waters, Wilmslow, Manchester, UK), respectively. Both MS systems were conducted with the UHPLC system, which were consisted with dual pumps (ACQUITY UPLC H-Class, Waters) and an autosampler with a column compartment (ACQUITY UPLC I-Class, Waters).

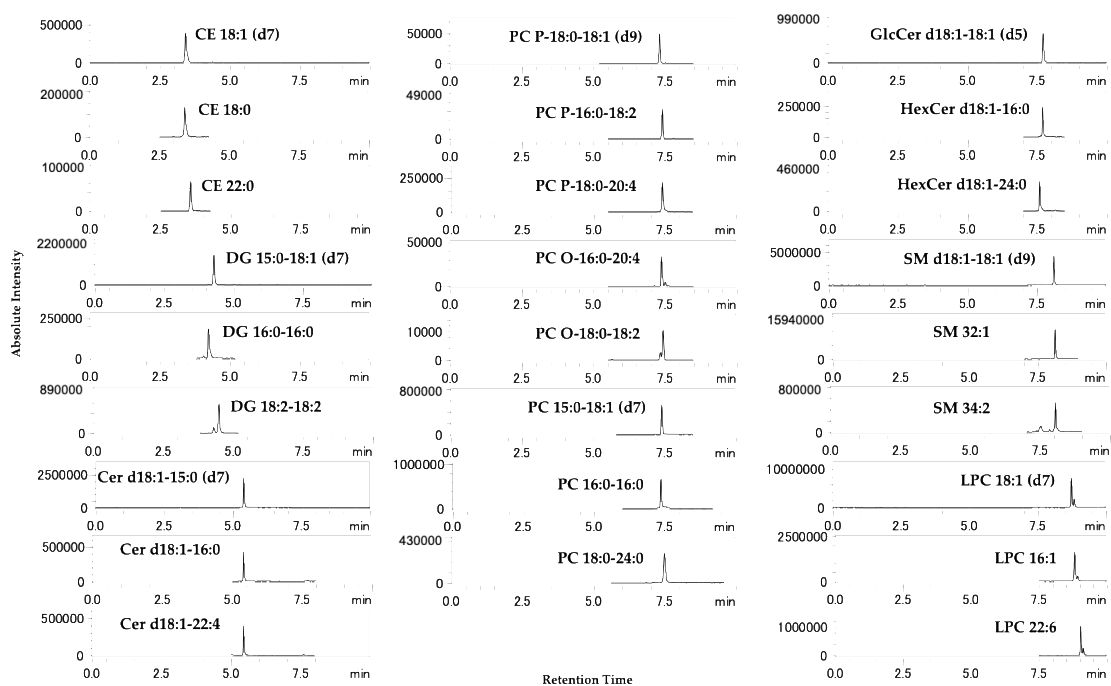

**Figure S3.** Multiple reaction monitoring chromatograms of representative lipid species detected in the NIST plasma samples by SFC-MS/MS.

# Total ion current (TIC)

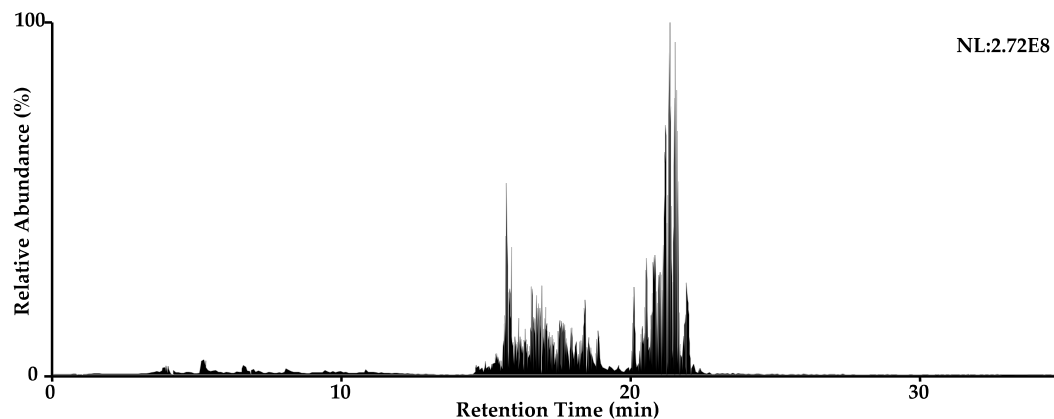

## Lysophosphatidylcholines (LPCs)

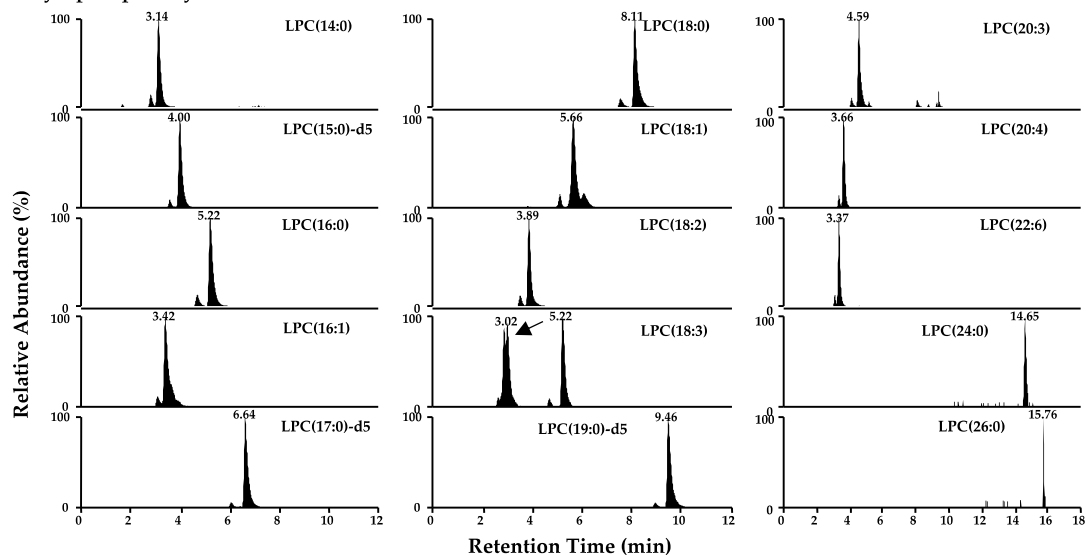

## Phosphatidylcholines (PCs)

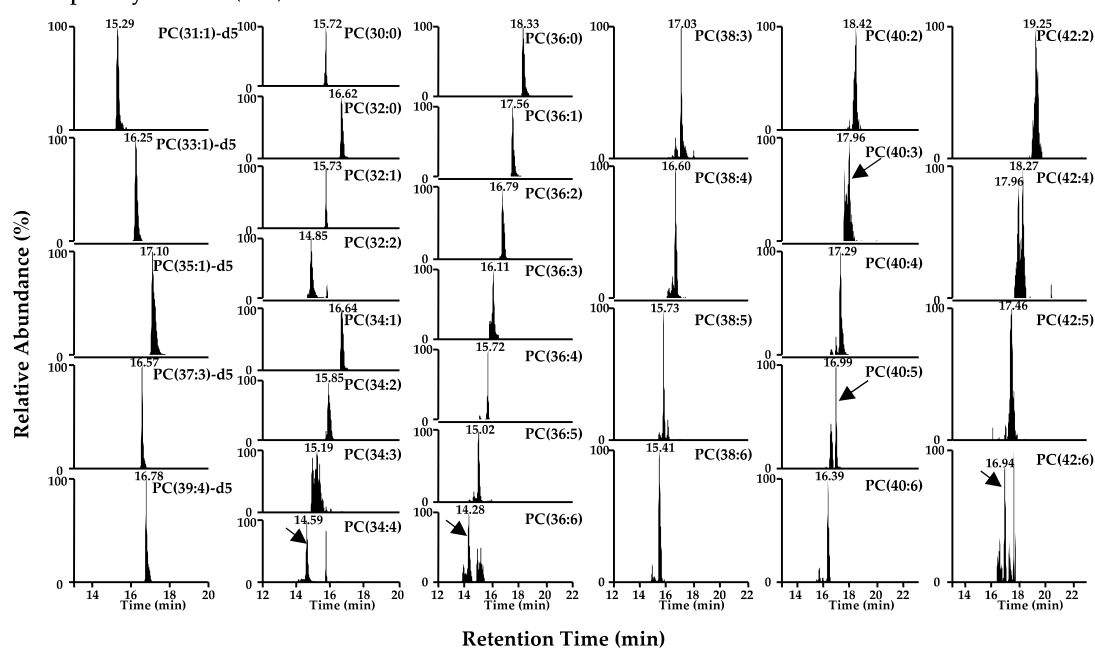

### Ceramides (Cers)

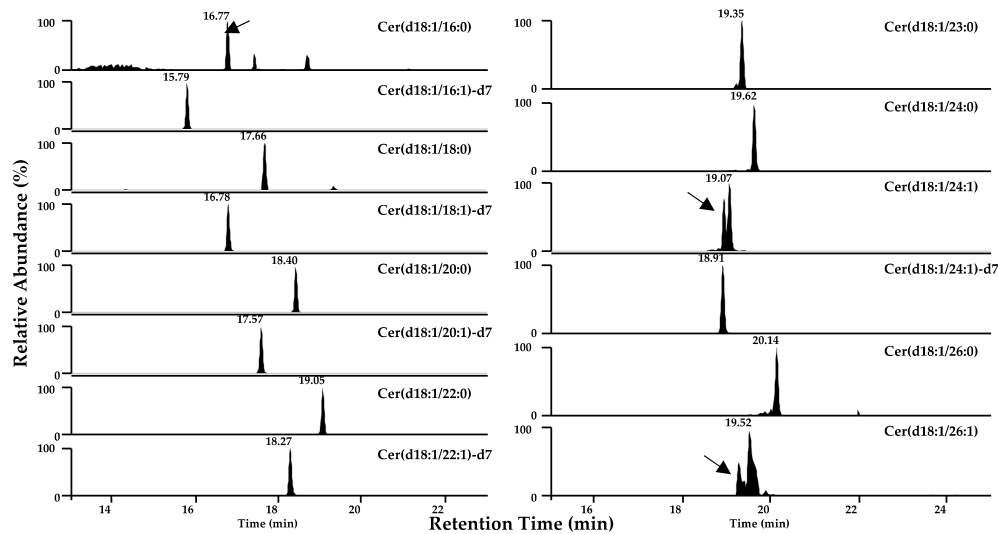

### Sphingomyelins (SMs)

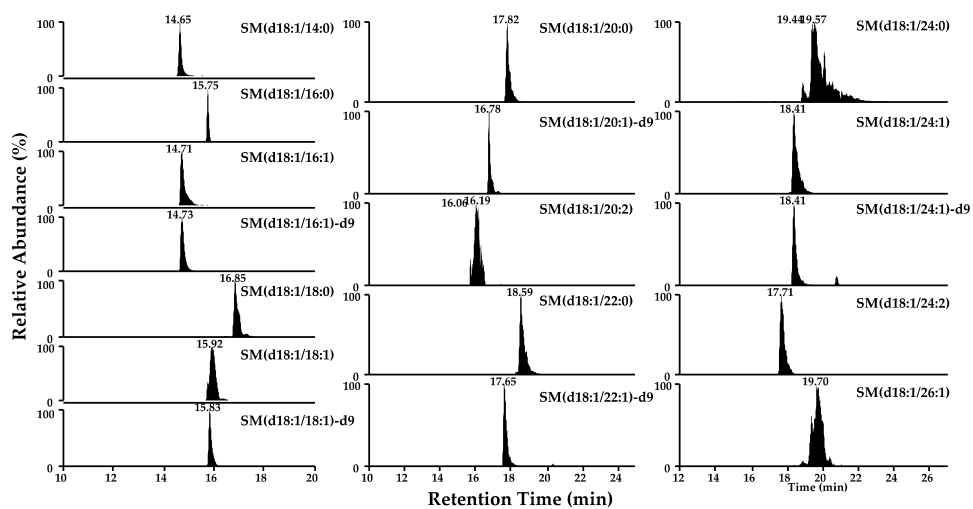

### hexosylceramides (HexCers)

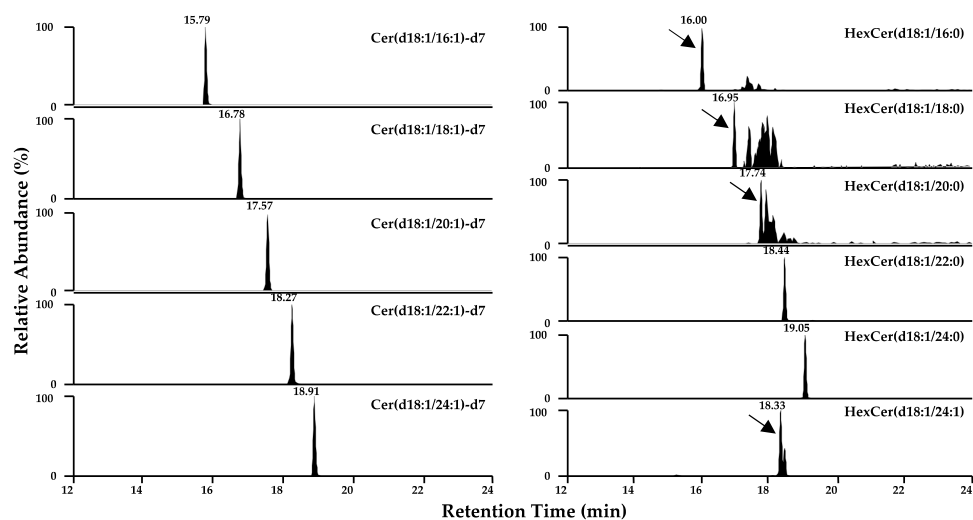

### Diacylglycerols (DGs)

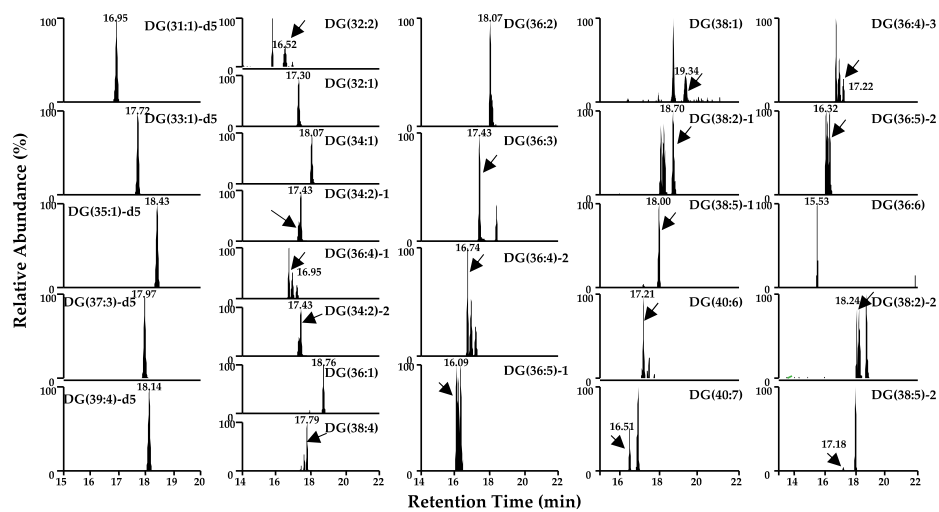

### Triacylglycerols (TGs)

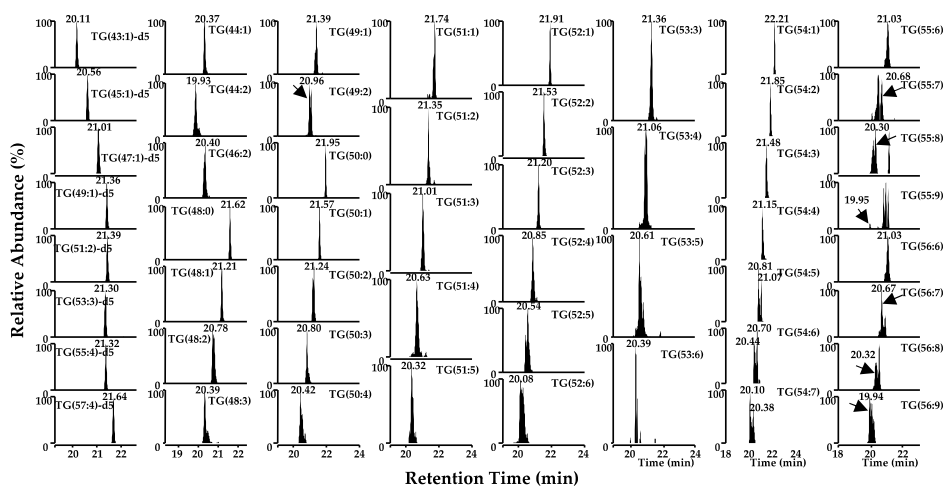

### Cholesterol esters (CEs)

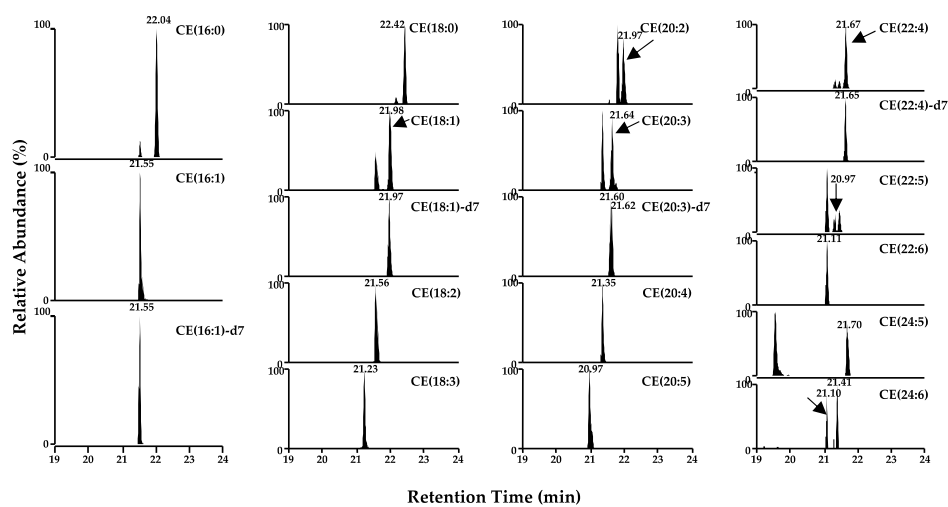

**Figure S4.** Total ion current (TIC) and mass chromatograms of 148 lipid species with ISs detected in the NIST plasma samples by UHPLC-FTMS at positive ion mode.

**(a) LC mode**

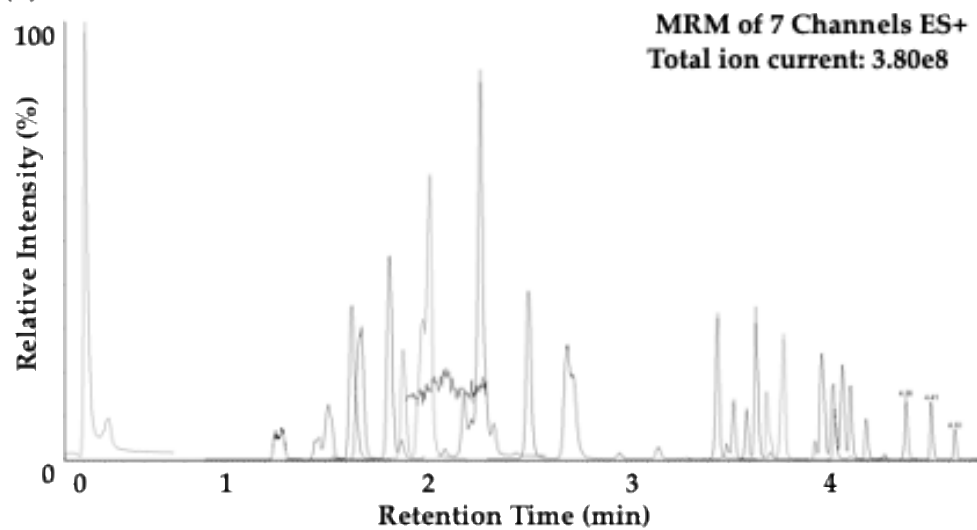

**(a) FIA mode**

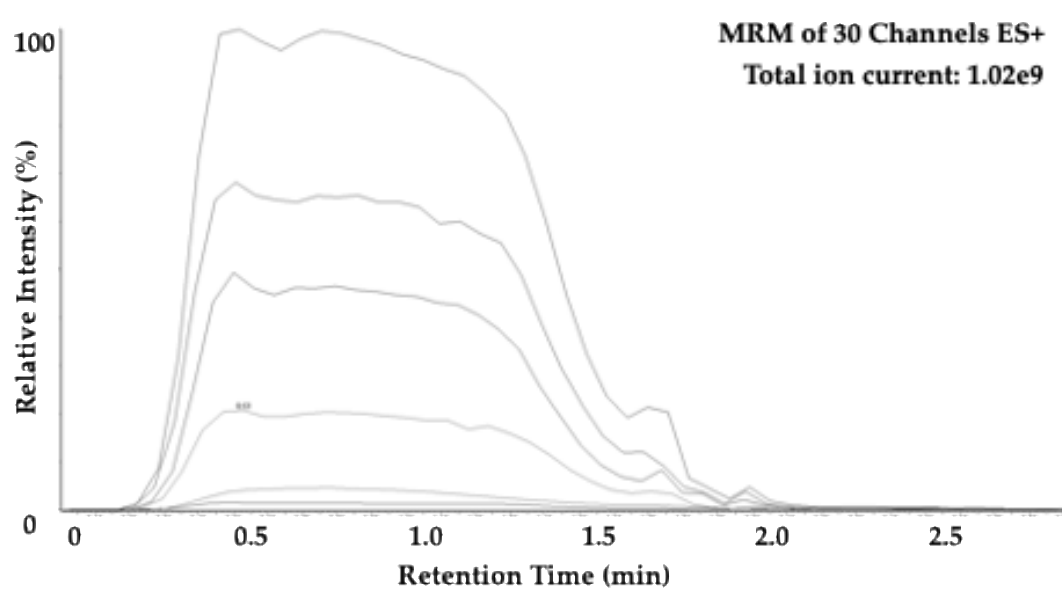

**Figure S5.** Examples for typical MRM chromatograms of NIST plasma sample analysis by Kit-Met 2 in UHPLC-MS/MS mode (a) and FIA-MS/MS mode (b).

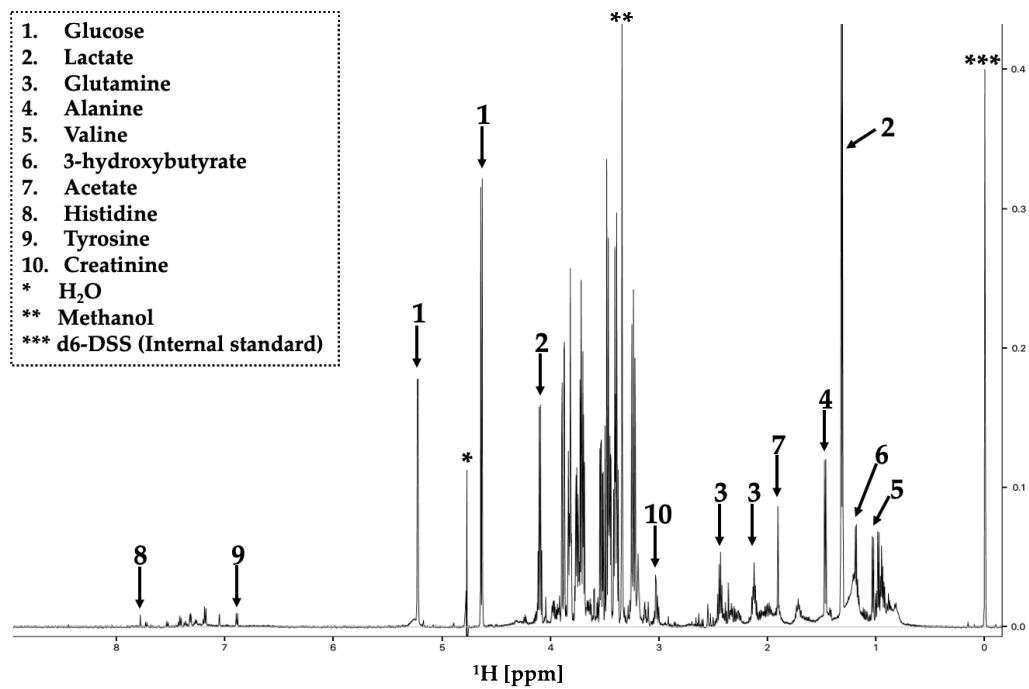

**Figure S6.** <sup>1</sup>H-NMR spectrum of detected metabolites in NIST plasma sample.
